# Supplementary material
Source: PubMed Central journal article supplement (PMC6842081)

**Supplemental Table 1. Self-reported characteristics for class participants**

| <b>Characteristic</b>                        | <b>All participants (n = 680)</b> |          | <b>Screening-eligible participants (n = 269)</b> |          |
|----------------------------------------------|-----------------------------------|----------|--------------------------------------------------|----------|
|                                              | <b>n</b>                          | <b>%</b> | <b>n</b>                                         | <b>%</b> |
| <b>Age (years)</b>                           |                                   |          |                                                  |          |
| <55                                          | 11                                | 2.0      |                                                  |          |
| 55-80                                        | 526                               | 97.8     | 269                                              | 100.0    |
| >80                                          | 1                                 | 0.2      |                                                  |          |
| Not reported                                 | 142                               |          |                                                  |          |
| Median (IQR):                                | 64.3 (59-69)                      |          | 64.0 (60-69)                                     |          |
| <b>Gender</b>                                |                                   |          |                                                  |          |
| Male                                         | 350                               | 59.8     | 167                                              | 59.8     |
| Female                                       | 235                               | 40.2     | 97                                               | 40.2     |
| Not reported                                 | 95                                |          | 5                                                |          |
| <b>Race/Ethnicity</b>                        |                                   |          |                                                  |          |
| Asian                                        | 63                                | 10.7     | 20                                               | 7.8      |
| Black                                        | 23                                | 3.9      | 6                                                | 2.3      |
| Hispanic                                     | 41                                | 6.9      | 16                                               | 6.2      |
| White                                        | 448                               | 75.9     | 214                                              | 82.9     |
| Other                                        | 15                                | 2.5      | 2                                                | 0.8      |
| Not reported                                 | 90                                |          | 11                                               |          |
| <b>Current smoking status</b>                |                                   |          |                                                  |          |
| Every day                                    | 308                               | 46.2     | 129                                              | 47.9     |
| Some days                                    | 57                                | 8.5      | 8                                                | 3.0      |
| Not at all                                   | 302                               | 45.3     | 132                                              | 49.1     |
| Not reported                                 | 13                                |          |                                                  |          |
| <b>Smoking quantity (cigarettes per day)</b> |                                   |          |                                                  |          |
| <10                                          | 88                                | 16.0     |                                                  |          |
| 10-19                                        | 159                               | 28.9     | 43                                               | 16.0     |
| 20-29                                        | 214                               | 38.9     | 155                                              | 57.6     |
| 30-39                                        | 53                                | 9.6      | 42                                               | 15.6     |
| 40-49                                        | 29                                | 5.3      | 23                                               | 8.6      |
| 50+                                          | 7                                 | 1.3      | 6                                                | 2.2      |
| Not reported                                 | 130                               |          |                                                  |          |
| Median (IQR):                                | 20.0 (10-20)                      |          | 40.0 (37-50)                                     |          |
| <b>Smoking duration (years)</b>              |                                   |          |                                                  |          |
| <30                                          | 60                                | 9.7      | 8                                                | 3.0      |
| 30-39                                        | 164                               | 26.5     | 71                                               | 26.4     |
| 40-49                                        | 253                               | 40.9     | 121                                              | 45.0     |
| 50+                                          | 142                               | 22.9     | 69                                               | 25.6     |
| Not reported                                 | 61                                |          |                                                  |          |

**Time since smoked regularly (former smokers only)**

|                           |     |      |    |      |
|---------------------------|-----|------|----|------|
| Within the last 12 months | 70  | 23.5 | 37 | 28.0 |
| 1-5 years ago             | 86  | 28.9 | 41 | 31.1 |
| 6-15 years ago            | 114 | 38.2 | 54 | 40.9 |
| More than 15 years ago    | 28  | 9.4  |    |      |
| Not reported              | 4   |      |    |      |

---

**Supplemental Table 2. Pre-class survey responses on attitudes regarding LCS, restricted to screening-eligible participants (n=269).**

| Statement                                                                                    | Response (%)   |       |          |                   |                     |              |
|----------------------------------------------------------------------------------------------|----------------|-------|----------|-------------------|---------------------|--------------|
|                                                                                              | Strongly Agree | Agree | Disagree | Strongly Disagree | Undecided/ Not Sure | Not Reported |
| I want to be screened for lung cancer.                                                       | 48.3           | 35.7  | 0.4      | 0.4               | 14.9                | 0.4          |
| I want to follow my doctor's recommendation.                                                 | 42.7           | 46.5  | 1.1      | 0.4               | 8.2                 | 1.1          |
| I am at risk for lung cancer.                                                                | 45.0           | 42.7  | 1.1      | 0.0               | 9.3                 | 1.9          |
| Having an abnormal result on the chest CT scan will cause me to worry.                       | 17.8           | 54.7  | 13.4     | 1.5               | 10.8                | 1.9          |
| I might put off having a lung scan because I worry about being blamed for having smoked.     | 3.4            | 11.5  | 46.8     | 30.1              | 6.0                 | 2.2          |
| I am worried about the additional tests that would be necessary if the scan found something. | 4.5            | 30.1  | 39.8     | 12.6              | 10.8                | 2.2          |
| I am worried about exposure to radiation from the CT scan.                                   | 1.9            | 16.0  | 50.9     | 16.3              | 13.0                | 1.9          |
| A normal CT scan will make me less worried about developing lung cancer.                     | 14.1           | 50.6  | 18.6     | 4.5               | 9.3                 | 3.0          |
| If my CT scan is normal, I can continue to smoke without worrying.                           | 2.2            | 2.2   | 40.5     | 48.0              | 4.8                 | 2.2          |
| If I have lung cancer, it is better not to know.                                             | 6.7            | 8.2   | 33.8     | 43.5              | 5.2                 | 2.6          |

## **SUPPLEMENTAL FIGURE LEGENDS**

**Supplemental Figure 1. Results from survey items used to assess knowledge regarding**

**LCS, restricted to screening-eligible class participants (n=269).** Correct answer (either

True [T] or False [F]) to each statement is indicated in parentheses.

**Supplemental Figure 2. Post-class results on decision-making capacity, restricted to**

**screening-eligible individuals (n=269).**

# Supplemental Figure 1

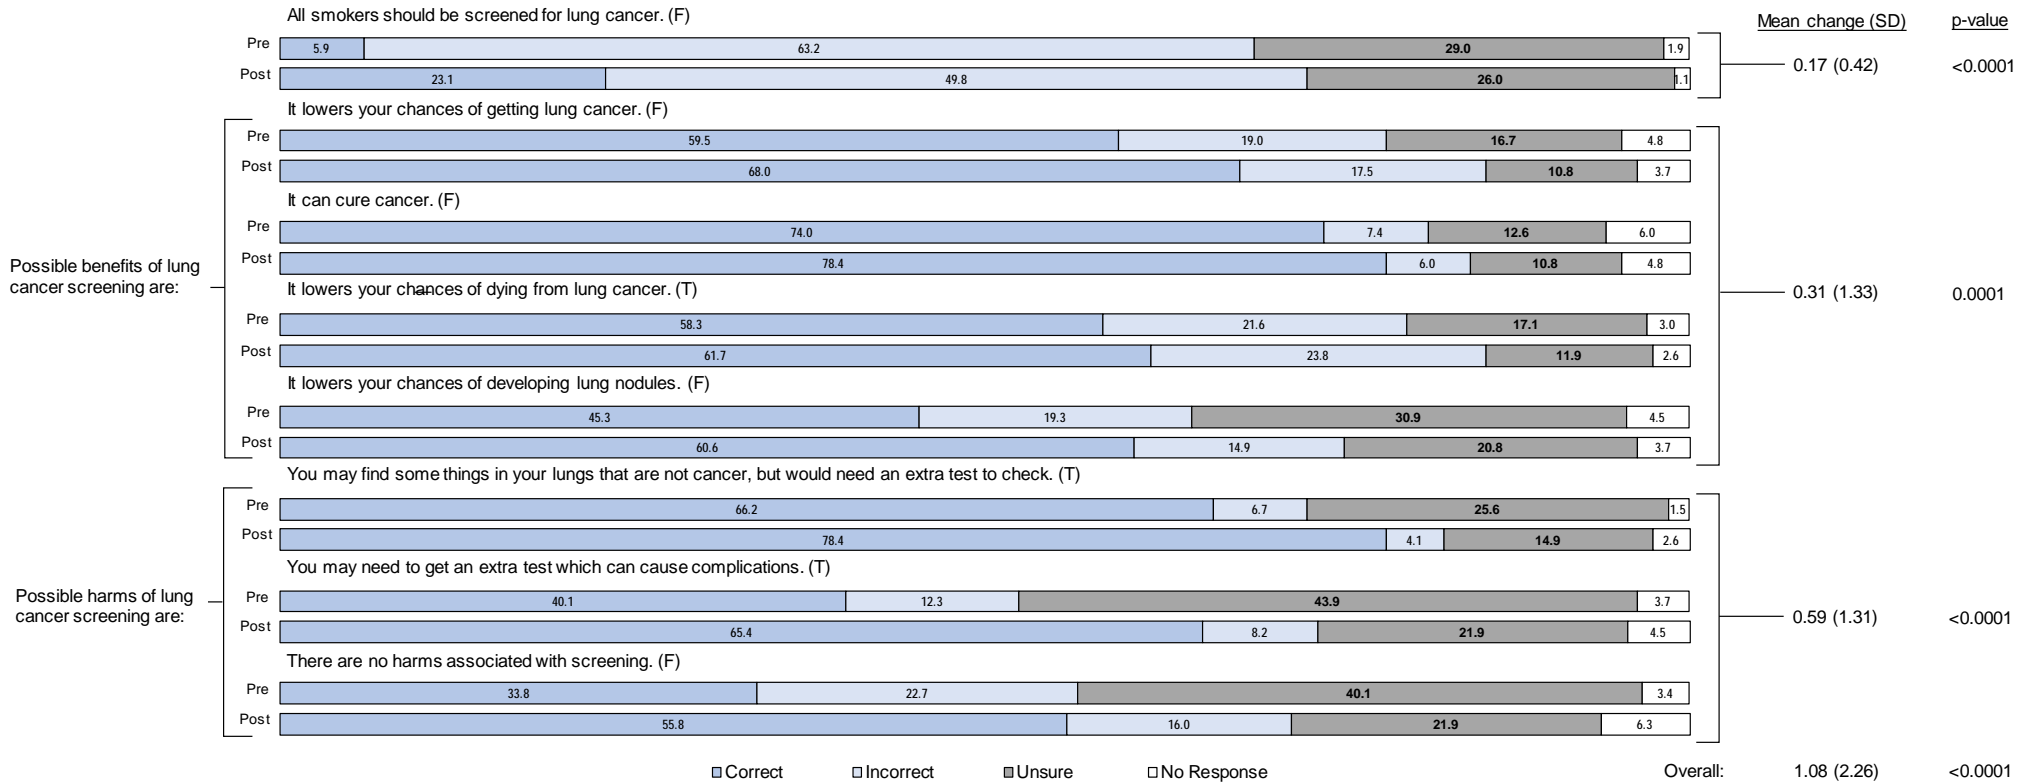

Supplemental Figure 2

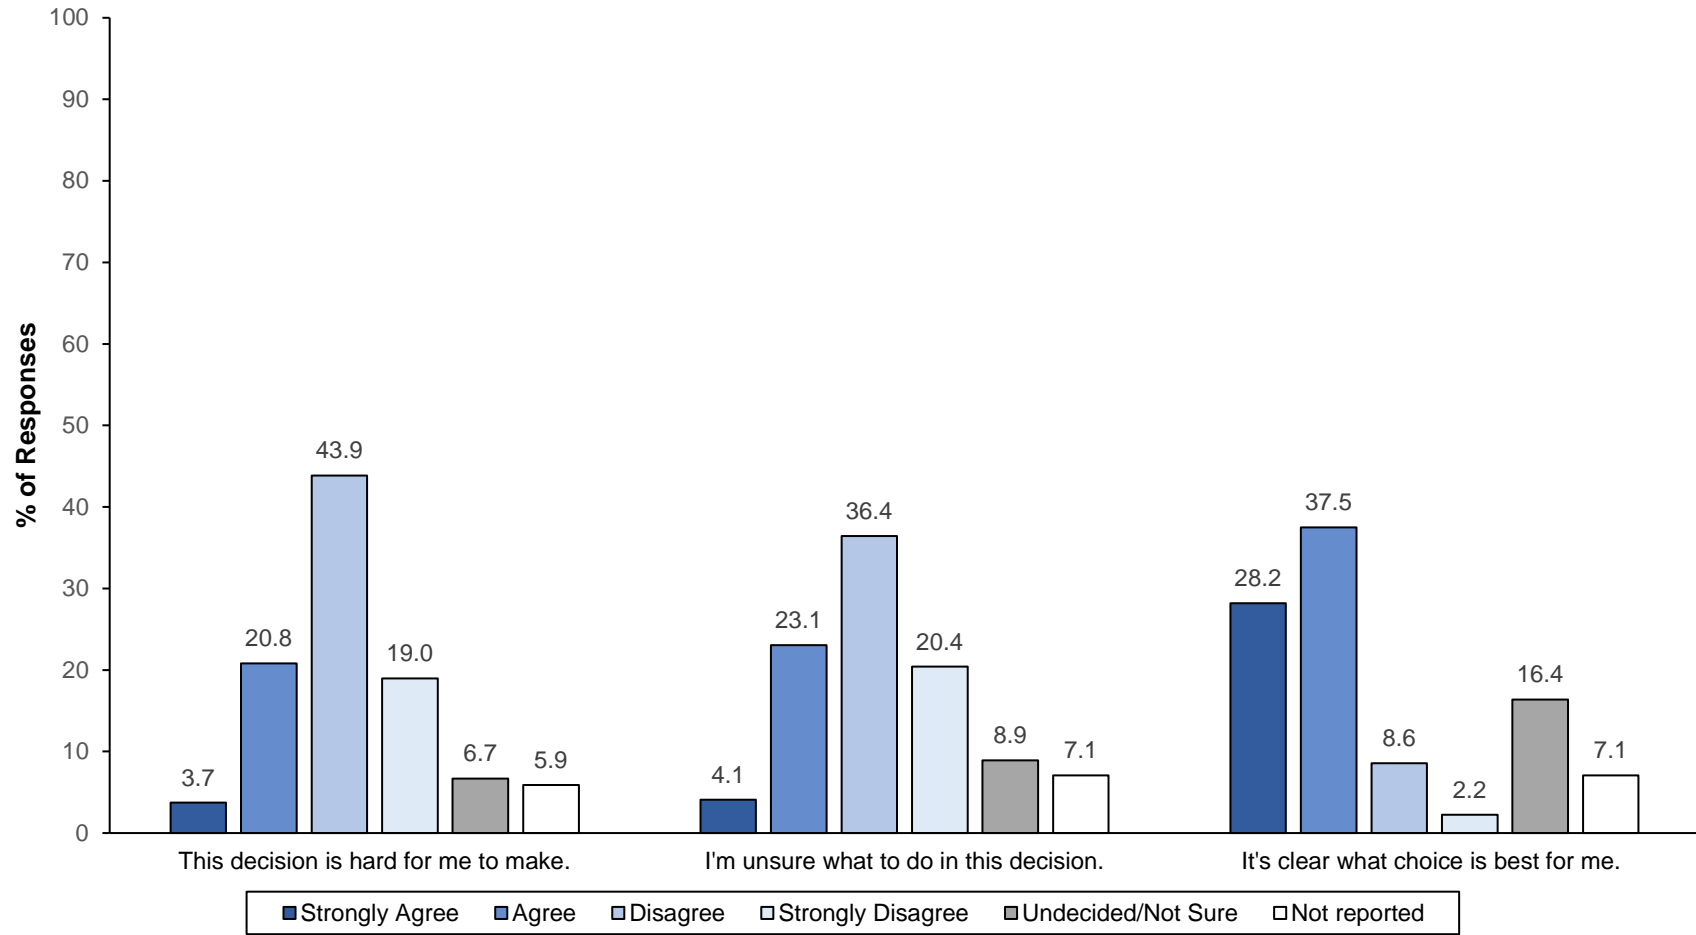

Supplement: NIHMS1529054-supplement-13187_2019_1540_MOESM1_ESM.pdf [file NIHMS1529054-supplement-13187_2019_1540_MOESM1_ESM.pdf]
